# Supplementary material
Source: Springer Nature journal article supplement (https://www.springermedizin.de/resource/supplementary/12985_2013_2331_MOESM5_ESM.pdf/9606504)

**A**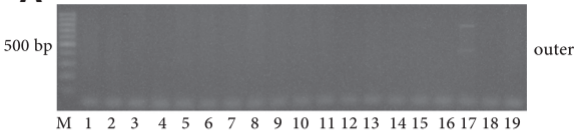**B**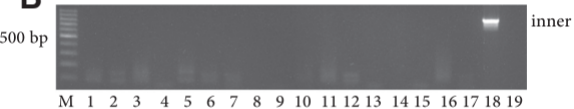**C**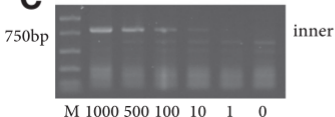

Supplement: MOESM5 [file 9606504]
